# Supplementary material for: High-throughput molecular simulations reveal the origin of ion free energy barriers in graphene oxide membranes
Source: Royal Society of Chemistry journal article supplement (doi:10.1039/d1nr02169a), 2021-01-01
Supplement: d1nr02169a1.pdf [file d1nr02169a1.pdf]

## Supporting Information

### High-Throughput Molecular Simulations Reveal the Origin of Ion Free Energy Barriers in Graphene Oxide Membranes

Christopher D. Williams\*, Paola Carbone and Flor R. Siperstein

Department of Chemical Engineering and Analytical Science, School of Engineering,  
The University of Manchester, Manchester, United Kingdom.

#### Data Tables

**Table S1.** Permeation free energy barriers,  $\Delta F_i$ , and pull energies,  $U_{\text{pull}}$ , for each  $\text{K}^+$  permeation pathway in GO membranes with a water content of 15% (average interlayer spacing,  $d = 0.79$  nm). The final column shows the convergence of free energy barrier with number of pathways obtained by selecting the minimum energy pathway and averaging over the five membranes. Units:  $\text{kJ mol}^{-1}$ .

| <i>i</i> | 1            |                   | 2            |                   | 3            |                   | 4            |                   | 5            |                   | $\Delta F$ |
|----------|--------------|-------------------|--------------|-------------------|--------------|-------------------|--------------|-------------------|--------------|-------------------|------------|
|          | $\Delta F_i$ | $U_{\text{pull}}$ |            |
| 1        | 193.7        | 10.1              | 104.5        | 3.4               | 151.9        | 6.4               | 77.7         | 3.0               | 42.6         | 8.9               | 114.1      |
| 2        | 53.6         | 7.7               | 86.8         | 4.1               | 162.8        | 6.0               | 59.8         | 2.9               | 204.6        | 12.0              | 79.0       |
| 3        | 129.2        | 8.6               | 67.6         | 4.1               | 174.7        | 6.9               | 206.0        | 4.5               | 50.4         | 10.4              | 75.1       |
| 4        | 208.9        | 8.4               | 57.8         | 3.4               | 169.8        | 6.3               | 132.1        | 3.7               | 101.4        | 12.8              | 73.2       |
| 5        | 113.2        | 8.9               | 245.4        | 6.6               | 46.0         | 5.4               | 124.5        | 3.2               | 129.6        | 12.5              | 52.0       |
| 6        | 78.0         | 7.9               | 450.2        | 8.5               | 134.5        | 6.7               | 205.8        | 5.2               | 157.2        | 8.5               | 52.0       |
| 7        | 161.7        | 11.5              | 104.6        | 3.5               | 89.4         | 6.4               | 261.7        | 5.6               | 69.3         | 9.4               | 52.0       |
| 8        | 71.5         | 8.5               | 112.7        | 3.9               | 78.9         | 7.7               | 58.9         | 2.3               | 71.1         | 9.0               | 51.8       |
| 9        | 125.5        | 10.6              | 88.3         | 3.9               | 359.5        | 11.6              | 137.8        | 3.7               | 89.0         | 7.6               | 51.8       |
| 10       | 140.5        | 9.6               | 89.5         | 3.5               | 172.1        | 8.8               | 41.7         | 2.3               | 42.4         | 7.7               | 48.3       |
| 11       | 224.6        | 9.9               | 136.7        | 5.6               | 178.3        | 6.0               | 137.5        | 3.3               | 72.9         | 8.9               | 48.3       |
| 12       | 169.8        | 9.3               | 96.5         | 4.8               | 463.9        | 10.2              | 66.3         | 3.0               | 145.5        | 8.9               | 48.3       |
| 13       | 171.1        | 11.6              | 98.8         | 3.6               | 109.3        | 6.1               | 169.7        | 5.8               | 71.4         | 8.7               | 48.3       |
| 14       | 194.5        | 8.8               | 193.7        | 5.7               | 53.9         | 5.8               | 50.4         | 2.4               | 160.8        | 9.5               | 48.3       |
| 15       | 146.3        | 8.5               | 107.5        | 7.2               | 119.0        | 7.0               | 346.6        | 10.4              | 95.7         | 15.0              | 48.3       |

**Table S2.** The two free energy barriers,  $\Delta F_i$ , for each water content and each of the five membrane models. Units:  $\text{kJ mol}^{-1}$ .

| <b>H<sub>2</sub>O</b> |          |          |          |          |          |          |          |          |          |          |
|-----------------------|----------|----------|----------|----------|----------|----------|----------|----------|----------|----------|
| <b>content</b>        | <b>1</b> | <b>2</b> | <b>3</b> | <b>4</b> | <b>5</b> | <b>1</b> | <b>2</b> | <b>3</b> | <b>4</b> | <b>5</b> |
| <b>(%)</b>            |          |          |          |          |          |          |          |          |          |          |
| <b>10</b>             | 49.1     | 107.0    | 66.4     | 66.1     | 56.7     | 88.2     | 105.2    | 105.6    | 138.1    | 98.7     |
| <b>15</b>             | 53.6     | 78.0     | 57.8     | 104.5    | 46.0     | 53.9     | 58.9     | 41.7     | 89.0     | 42.4     |
| <b>20</b>             | 40.1     | 57.5     | 56.4     | 35.9     | 46.6     | 33.9     | 34.5     | 60.4     | 46.0     | 41.1     |
| <b>25</b>             | 30.4     | 46.1     | 22.4     | 17.3     | 24.3     | 30.4     | 48.9     | 44.0     | 30.7     | 27.5     |
| <b>30</b>             | 47.9     | 22.1     | 64.4     | 33.6     | 47.4     | 28.5     | 38.5     | 27.0     | 18.7     | 24.9     |
| <b>35</b>             | 22.4     | 25.1     | 11.2     | 37.2     | 10.7     | 21.1     | 21.2     | 28.9     | 22.8     | 29.0     |
| <b>40</b>             | 13.6     | 45.6     | 19.6     | 16.7     | 38.3     | 14.7     | 25.7     | 12.7     | 19.3     | 23.2     |

**Table S3.** Average  $n_{\text{KOW}}$  from the lowest energy pathway from each of the five membrane models at each water content.

| <b>H<sub>2</sub>O content (wt%)</b> | <b>10</b>   | <b>15</b>   | <b>20</b>   | <b>25</b>   | <b>30</b>   | <b>35</b>   | <b>40</b>   |
|-------------------------------------|-------------|-------------|-------------|-------------|-------------|-------------|-------------|
| <b><i>d</i> (nm)</b>                | <b>0.76</b> | <b>0.79</b> | <b>0.87</b> | <b>0.96</b> | <b>1.06</b> | <b>1.19</b> | <b>1.35</b> |
| 1                                   | 3.9         | 4.0         | 5.0         | 5.9         | 5.8         | 6.0         | 6.3         |
| 2                                   | 4.3         | 4.3         | 5.3         | 5.7         | 5.1         | 6.1         | 6.0         |
| 3                                   | 3.9         | 4.9         | 5.2         | 5.8         | 5.4         | 6.3         | 6.3         |
| 4                                   | 4.0         | 4.4         | 4.8         | 5.2         | 5.7         | 6.0         | 5.9         |
| 5                                   | 3.6         | 4.7         | 4.9         | 5.5         | 5.7         | 6.2         | 6.1         |
| average                             | 3.9         | 4.5         | 5.1         | 5.6         | 5.6         | 6.1         | 6.1         |
| % of bulk $n_{\text{KOW}}$          | 54          | 62          | 70          | 77          | 77          | 84          | 84          |

**Table S4.** Maximum  $n_{\text{KOW}}$  from the 50 umbrella sampling windows for the lowest energy pathway for each of the five membrane models at varying water content.

| <b>H<sub>2</sub>O content (wt%)</b> | <b>10</b>   | <b>15</b>   | <b>20</b>   | <b>25</b>   | <b>30</b>   | <b>35</b>   | <b>40</b>   |
|-------------------------------------|-------------|-------------|-------------|-------------|-------------|-------------|-------------|
| <b><i>d</i> (nm)</b>                | <b>0.76</b> | <b>0.79</b> | <b>0.87</b> | <b>0.96</b> | <b>1.06</b> | <b>1.19</b> | <b>1.35</b> |
| 1                                   | 5.7         | 4.8         | 6.4         | 6.3         | 6.6         | 6.5         | 6.7         |
| 2                                   | 4.9         | 5.8         | 6.6         | 6.3         | 6.4         | 6.4         | 6.7         |
| 3                                   | 5.2         | 6.5         | 6.1         | 6.7         | 6.1         | 6.5         | 6.7         |
| 4                                   | 5.9         | 5.8         | 6.4         | 6.5         | 6.5         | 6.5         | 6.8         |
| 5                                   | 5.0         | 5.9         | 6.4         | 6.3         | 6.4         | 6.6         | 6.8         |
| average                             | 5.4         | 5.8         | 6.4         | 6.4         | 6.4         | 6.5         | 6.7         |
| % of bulk $n_{\text{KOW}}$          | 74          | 79          | 88          | 88          | 88          | 90          | 93          |

**Table S5.** Minimum  $n_{\text{KOW}}$  from the 50 umbrella sampling windows for the lowest energy pathway for each of the five membrane models at varying water content.

| <b>H<sub>2</sub>O content (wt%)</b> | <b>10</b>   | <b>15</b>   | <b>20</b>   | <b>25</b>   | <b>30</b>   | <b>35</b>   | <b>40</b>   |
|-------------------------------------|-------------|-------------|-------------|-------------|-------------|-------------|-------------|
| <b><i>d</i> (nm)</b>                | <b>0.76</b> | <b>0.79</b> | <b>0.87</b> | <b>0.96</b> | <b>1.06</b> | <b>1.19</b> | <b>1.35</b> |
| 1                                   | 1.0         | 2.7         | 3.1         | 4.4         | 4.4         | 3.9         | 4.7         |
| 2                                   | 3.1         | 2.7         | 3.1         | 4.1         | 3.8         | 4.2         | 3.1         |
| 3                                   | 2.8         | 3.6         | 3.2         | 4.9         | 3.9         | 5.4         | 5.1         |
| 4                                   | 1.4         | 3.3         | 2.4         | 3.4         | 3.6         | 4.1         | 4.4         |
| 5                                   | 1.6         | 3.1         | 2.7         | 3.6         | 4.3         | 4.1         | 4.4         |
| average                             | 2.0         | 3.1         | 2.9         | 4.1         | 4.0         | 4.1         | 4.3         |
| % of bulk $n_{\text{KOW}}$          | 27          | 42          | 40          | 56          | 55          | 60          | 60          |

**Table S6.** Average  $n_{KO}$  for the lowest energy pathway, averaged over all 50 umbrella sampling windows for each of the five membrane models at varying water content.

| <b>H<sub>2</sub>O content (wt%)</b> | <b>10</b>   | <b>15</b>   | <b>20</b>   | <b>25</b>   | <b>30</b>   | <b>35</b>   | <b>40</b>   |
|-------------------------------------|-------------|-------------|-------------|-------------|-------------|-------------|-------------|
| <b><i>d</i> (nm)</b>                | <b>0.76</b> | <b>0.79</b> | <b>0.87</b> | <b>0.96</b> | <b>1.06</b> | <b>1.19</b> | <b>1.35</b> |
| 1                                   | 6.8         | 6.9         | 7.5         | 7.3         | 7.4         | 7.6         | 7.4         |
| 2                                   | 6.5         | 7.2         | 7.6         | 7.5         | 7.6         | 7.4         | 7.5         |
| 3                                   | 7.0         | 7.2         | 7.4         | 7.5         | 7.6         | 7.5         | 7.6         |
| 4                                   | 7.0         | 6.9         | 7.9         | 7.3         | 7.2         | 7.5         | 7.4         |
| 5                                   | 7.0         | 7.3         | 7.8         | 7.5         | 7.6         | 7.6         | 7.3         |
| average                             | 7.1         | 7.1         | 7.6         | 7.4         | 7.5         | 7.5         | 7.4         |
| % of bulk $n_{KOW}$                 | 95          | 97          | 105         | 102         | 103         | 104         | 102         |

**Table S7.** Maximum  $n_{KO}$  from the 50 umbrella sampling windows for the lowest energy pathway for each of the five membrane models at varying water content.

| <b>H<sub>2</sub>O content (wt%)</b> | <b>10</b>   | <b>15</b>   | <b>20</b>   | <b>25</b>   | <b>30</b>   | <b>35</b>   | <b>40</b>   |
|-------------------------------------|-------------|-------------|-------------|-------------|-------------|-------------|-------------|
| <b><i>d</i> (nm)</b>                | <b>0.76</b> | <b>0.79</b> | <b>0.87</b> | <b>0.96</b> | <b>1.06</b> | <b>1.19</b> | <b>1.35</b> |
| 1                                   | 8.7         | 9.0         | 8.5         | 8.7         | 8.5         | 8.6         | 8.4         |
| 2                                   | 8.9         | 9.5         | 8.6         | 8.8         | 8.7         | 8.5         | 9.6         |
| 3                                   | 8.6         | 8.6         | 8.4         | 8.6         | 9.5         | 8.4         | 9.3         |
| 4                                   | 8.8         | 8.5         | 9.2         | 9.2         | 9.0         | 8.7         | 8.2         |
| 5                                   | 8.8         | 9.3         | 9.2         | 8.5         | 8.6         | 9.4         | 8.6         |
| average                             | 8.8         | 9.0         | 8.8         | 8.8         | 8.9         | 8.7         | 8.8         |
| % of bulk $n_{KOW}$                 | 121         | 124         | 121         | 121         | 122         | 120         | 121         |

**Table S8.** Minimum  $n_{KO}$  from the 50 umbrella sampling windows for the lowest energy pathway for each of the five membrane models at varying water content.

| <b>H<sub>2</sub>O content (wt%)</b> | <b>10</b>   | <b>15</b>   | <b>20</b>   | <b>25</b>   | <b>30</b>   | <b>35</b>   | <b>40</b>   |
|-------------------------------------|-------------|-------------|-------------|-------------|-------------|-------------|-------------|
| <b><i>d</i> (nm)</b>                | <b>0.76</b> | <b>0.79</b> | <b>0.87</b> | <b>0.96</b> | <b>1.06</b> | <b>1.19</b> | <b>1.35</b> |
| 1                                   | 6.3         | 5.7         | 5.6         | 7.1         | 6.6         | 6.8         | 6.9         |
| 2                                   | 5.8         | 5.9         | 6.7         | 7.0         | 7.0         | 6.2         | 6.7         |
| 3                                   | 6.3         | 5.3         | 6.4         | 7.3         | 6.7         | 7.3         | 6.9         |
| 4                                   | 6.1         | 6.0         | 6.3         | 6.3         | 6.6         | 6.9         | 7.0         |
| 5                                   | 6.0         | 6.4         | 7.1         | 7.1         | 6.4         | 6.9         | 6.8         |
| average                             | 6.1         | 5.9         | 6.4         | 6.9         | 6.7         | 6.8         | 6.9         |
| % of bulk $n_{KOW}$                 | 84          | 81          | 89          | 96          | 92          | 94          | 94          |
